# Supplementary material
Source: PubMed Central journal article supplement (PMC2926212)
Supplement: NIHMS215355-supplement-01.pdf [file NIHMS215355-supplement-01.pdf]

### **Infection Categories and Respective *ICD-9-CM* codes**

Bacteremia:

*790.7*

Endocarditis:

*421.x*

Gastrointestinal/Hepatobiliary Infections: Peritonitis, Anal/Rectal Abscess, Abscess of Intestine, Diverticulitis, C Difficile Colitis, Viral hepatitis, Cholecystitis

*566, 008.45, 569.5, 562.11, 070, 574.0, 574.1, 574.3, 574.4, 574.6, 574.7, 574.8, 575.0, 575.1*

Genitourinary Tract Infections: Urinary Tract Infection, Pyelonephritis, or Renal/Perinephric Abscess

*599.0, 590.1x, 590.2, 590.80, 590.9*

Joint or Bone Infections: Infective Arthritis, Acute or Unspecified Osteomyelitis

*711.0x, 711.9x, 730.0x, 730.2x*

Peritonitis:

*567.0, 567.1, 567.2, 567.9*

Pulmonary Infections: Pneumonia or abscess of lung/mediastinum

*480.x, 481.x, 482.x, 483.x, 484.x, 485, 486, 487.0, 487.1, 513*

Septicemia:

*038.xx*

Soft Tissue Infections: Cellulitis, Necrotizing Fasciitis, Gangrene or Gas Gangrene

*681.00, 681.10, 681.9, 682.x, 728.86, 785.4, 040.0*

### **Categories of Infection-Related Death and Respective United States Renal Data**

#### **System Codes:**

AIDS: Code 59

Infection (including other): Codes 13, 60

Pulmonary infection (including bacterial, fungal, or other): Codes 10, 53, 54, 55

Peritonitis (septicemia due to peritonitis, fungal): Codes 50, 74

Septicemia (including due to vascular access, peripheral vascular disease, gangrene, or other):

Codes: 11, 49, 51, 52

Tuberculosis: Code 58

Viral infection (hepatitis B, viral hepatitis, other viral hepatitis or other): Codes 12, 57, 64, 65
